# Supplementary material for: A cyclic RGD-coated peptide nanoribbon as a selective intracellular nanocarrier
Source: Royal Society of Chemistry journal article supplement (doi:10.1039/b802470g), 2008-01-01
Supplement: b802470g.pdf [file b802470g.pdf]

## **A Cyclic RGD-coated Peptide Nanoribbon as a Selective Intracellular Nanocarrier**

Yong-beom Lim,<sup>a</sup> Oh-Joon Kwon,<sup>b</sup> Eunji Lee,<sup>a</sup> Pyung-Hwan Kim,<sup>b</sup> Chae-Ok Yun<sup>b</sup> and  
Myongsoo Lee,<sup>\*a</sup>

<sup>a</sup> Centre for Supramolecular Nano-Assembly, Department of Chemistry, Yonsei University, Shinchon 134, Seoul 120-749, Korea. Fax: 82 2 393 6096; Tel: 82 2 2123 2647; E-mail: [mslee@yonsei.ac.kr](mailto:mslee@yonsei.ac.kr)

<sup>b</sup> Brain Korea 21 Project for Medical Science, Institute for Cancer Research, Yonsei Cancer Centre, Yonsei University College of Medicine, Seoul, Korea.

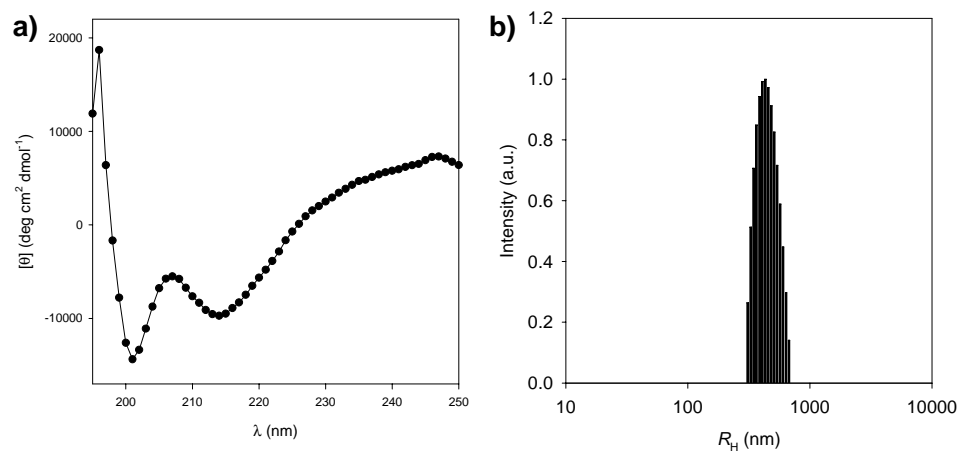

**Figure S1.** a) CD and b) DLS spectra of cRGD-FKFE and TAMRA-FKE coassembled at 200:1 molar ratio in PBS.

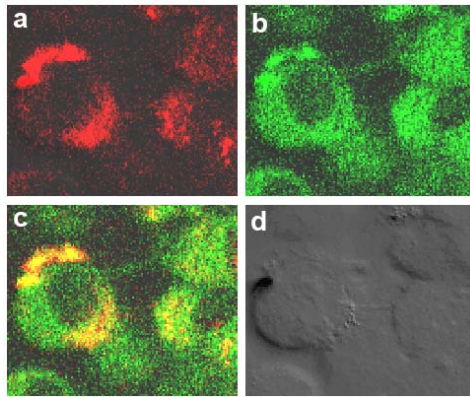

**Figure S2.** CLSM image. Endocytic cell entry of cRGD-FKFE. a) Red fluorescence from coassembled cRGD-FKE/TAMRA-FKE  $\beta$ -ribbon. b) Green fluorescence from LysoTracker Green DND-26. c) Overlay of a) and b). d) A bright field image.
